# Supplementary material for: Mobility impairment is associated with reduced microstructural integrity of the inferior and superior cerebellar peduncles in elderly with no clinical signs of cerebellar dysfunction
Source: PubMed Central journal article supplement — Neuroimage Clin. 2013 Mar 1;2:332–40. doi: 10.1016/j.nicl.2013.02.003 (PMC3777843; doi:10.1016/j.nicl.2013.02.003), 2013-03-01
Supplement: mmc1.pdf [file mmc1.pdf]

**Supplementary Table 1**

Correlation of diffusion tensor imaging (DTI) indices of the cerebellar peduncles with SPPB sub-scores.

| <b>Peduncle DTI-index</b> | <b>Walk Time score</b> | <b>Chair Rise score</b> | <b>Balance score</b> |
|---------------------------|------------------------|-------------------------|----------------------|
| ICP-FA                    | <b>0.319 (0.003)</b>   | <b>0.364 (0.001)</b>    | <b>0.245 (0.024)</b> |
| ICP-MD                    | 0.014 (0.902)          | 0.08 (0.467)            | 0.086 (0.434)        |
| ICP-AD                    | <b>0.251 (0.021)</b>   | <b>0.350 (0.001)</b>    | <b>0.264 (0.015)</b> |
| ICP-RD                    | -0.14 (0.200)          | -0.102 (0.352)          | -0.043 (0.695)       |
| MCP-FA                    | 0.208 (0.056)          | 0.158 (0.148)           | 0.102 (0.355)        |
| MCP-MD                    | -0.047 (0.668)         | -0.048 (0.664)          | -0.003 (0.978)       |
| MCP-AD                    | 0.097 (0.377)          | 0.055 (0.616)           | 0.034 (0.761)        |
| MCP-RD                    | -0.164 (0.134)         | -0.132 (0.228)          | -0.078 (0.479)       |
| SCP-FA                    | <b>0.214 (0.049)</b>   | <b>0.235 (0.031)</b>    | <b>0.254 (0.019)</b> |
| SCP-MD                    | 0.118 (0.283)          | 0.029 (0.789)           | -0.036 (0.747)       |
| SCP-AD                    | <b>0.303 (0.005)</b>   | 0.201 (0.065)           | 0.201 (0.066)        |
| SCP-RD                    | -0.089 (0.420)         | -0.149 (0.174)          | -0.193 (0.077)       |

Associations are expressed as Spearman's rho ( $\rho$ ). Statistical significance is indicated in bold ( $p \leq 0.05$ ). Abbreviations: Short physical performance battery (SPPB); inferior cerebellar peduncles (ICP); middle cerebellar peduncles (MCP); superior cerebellar peduncles (SCP); fractional anisotropy (FA); mean diffusivity (MD); axial diffusivity (AD); radial diffusivity (RD).

**Supplementary Table 2**

Correlation between diffusion tensor imaging (DTI) indices in selected brain stem tracts (cerebral peduncles, corticospinal tracts) and SPPB total score and sub-scores.

| <b>Peduncle<br/>DTI-index</b> | <b>SPPB<br/>total score</b> | <b>Walk Time<br/>score</b> | <b>Chair Rise<br/>score</b> | <b>Balance<br/>score</b> | <b>Walk time</b>      |
|-------------------------------|-----------------------------|----------------------------|-----------------------------|--------------------------|-----------------------|
| CP-FA                         | <b>0.265 (0.014)</b>        | <b>0.254 (0.019)</b>       | 0.200 (0.066)               | 0.150 (0.171)            | <b>-0.324 (0.002)</b> |
| CP-MD                         | 0.093 (0.395)               | 0.074 (0.502)              | 0.079 (0.474)               | 0.073 (0.509)            | -0.037 (0.736)        |
| CP-AD                         | <b>0.336 (0.002)</b>        | <b>0.312 (0.004)</b>       | <b>0.260 (0.016)</b>        | 0.207 (0.058)            | <b>-0.281 (0.009)</b> |
| CP-RD                         | -0.142 (0.194)              | -0.149 (0.175)             | -0.112 (0.306)              | -0.058 (0.598)           | 0.212 (0.052)         |
| CST-FA                        | <b>0.290 (0.007)</b>        | <b>0.230 (0.034)</b>       | <b>0.219 (0.044)</b>        | <b>0.215 (0.048)</b>     | <b>-0.242 (0.025)</b> |
| CST-MD                        | -0.049 (0.656)              | 0.006 (0.958)              | -0.100 (0.361)              | 0.083 (0.449)            | 0.046 (0.673)         |
| CST-AD                        | 0.139 (0.203)               | 0.136 (0.215)              | 0.036 (0.743)               | <b>0.255 (0.018)</b>     | -0.077 (0.482)        |
| CST-RD                        | -0.155 (0.157)              | -0.072 (0.512)             | -0.157 (0.153)              | -0.050 (0.652)           | 0.116 (0.290)         |

Associations are expressed as Spearman's rho ( $\rho$ ). Statistical significance is indicated in bold ( $p \leq 0.05$ ). Abbreviations: short physical performance battery (SPPB); cerebral peduncles (CP); corticospinal tracts (CST); fractional anisotropy (FA); mean diffusivity (MD); axial diffusivity (AD); radial diffusivity (RD).

**Supplementary Table 3**

Correlation between mobility performance measures and diffusion tensor imaging (DTI) indices in brain stem selected tracts (cerebral peduncles, corticospinal tracts).

| <b>Peduncle<br/>DTI-index</b> | <b>SPMV</b>          | <b>Velocity</b>      | <b>Tinetti Gait</b>  | <b>Tinetti Balance</b> |
|-------------------------------|----------------------|----------------------|----------------------|------------------------|
| CP-FA                         | <b>0.303 (0.02)</b>  | <b>0.305 (0.019)</b> | 0.058 (0.658)        | 0.084 (0.517)          |
| CP-MD                         | 0.143 (0.28)         | 0.117 (0.377)        | 0.207 (0.109)        | 0.24 (0.06)            |
| CP-AD                         | <b>0.323 (0.013)</b> | <b>0.304 (0.019)</b> | 0.239 (0.063)        | <b>0.286 (0.024)</b>   |
| CP-RD                         | -0.130 (0.327)       | -0.136 (0.303)       | 0.034 (0.796)        | 0.039 (0.765)          |
| CST-FA                        | <b>0.327 (0.011)</b> | <b>0.329 (0.011)</b> | 0.122 (0.348)        | 0.208 (0.105)          |
| CST-MD                        | -0.043 (0.749)       | -0.006 (0.963)       | 0.137 (0.292)        | 0.124 (0.336)          |
| CST-AD                        | 0.131 (0.322)        | 0.193 (0.143)        | <b>0.292 (0.022)</b> | 0.244 (0.056)          |
| CST-RD                        | -0.148 (0.263)       | -0.126 (0.341)       | 0.036 (0.785)        | 0.019 (0.883)          |

Associations are expressed as Spearman's rho ( $\rho$ ). Statistical significance is indicated in bold ( $p \leq 0.05$ ). Abbreviations: self-paced maximum velocity (SPMV); cerebral peduncles (CP); corticospinal tracts (CST); fractional anisotropy (FA); mean diffusivity (MD); axial diffusivity (AD); radial diffusivity (RD).
